# Supplementary material
Source: PubMed Central journal article supplement (PMC2518100)
Supplement: NIHMS60161-supplement-SI.pdf [file NIHMS60161-supplement-SI.pdf]

Supporting Information for

**Transition State Analogue Discrimination by Related Purine Nucleoside  
Phosphorylases**

Erika A. Taylor Ringia<sup>a</sup>, Peter C. Tyler<sup>b</sup>, Gary B. Evans<sup>b</sup>, Richard H.

Furneaux<sup>b</sup>, Andrew S. Murkin<sup>a</sup> and Vern L. Schramm<sup>a\*</sup>

*<sup>a</sup>Department of Biochemistry, Albert Einstein College of Medicine, Bronx,*

*NY 10461 and <sup>b</sup>Carbohydrate Chemistry Team, Industrial Research Ltd.,*

*Lower Hutt, New Zealand.*

**General.** All chemicals were analytical grade or the highest quality commercially available. NMR spectra were recorded on a Bruker AC-300 instrument at 300 MHz (<sup>1</sup>H) or 75 MHz (<sup>13</sup>C) when D<sub>2</sub>O was the solvent, acetone ( $\delta$  <sup>1</sup>H, 2.20; <sup>13</sup>C, 33.2) was used as an internal reference. High-resolution accurate mass determinations were performed by Hort Research Ltd., Palmerston North, N. Z., on a VG70-250S double focusing, magnetic sector mass spectrometer under chemical ionization conditions using isobutane or ammonia as the ionizing gas, or under high-resolution FAB conditions in a glycerol or nitrobenzyl alcohol matrix. Melting points were determined on a Reichert hot stage microscope and are uncorrected. BtPNP was obtained from Sigma (St. Louis, MO) and HsPNP was prepared as a His<sub>6</sub>-N-terminal fusion protein as previously published.<sup>1</sup> Protein concentrations were determined by UV absorbance using the extinction coefficients 27550 M<sup>-1</sup> cm<sup>-1</sup> and 28830 M<sup>-1</sup> cm<sup>-1</sup> at 280 nm for BtPNP and HsPNP,

respectively.<sup>1</sup> Inhibitor concentrations were also determined by UV absorbance using the published extinction coefficient of 9540 M<sup>-1</sup> cm<sup>-1</sup> at 261 nm.<sup>2</sup> Kinetic parameters used in the determination of inhibition constants were determined independently to be  $K_M = 34$   $\mu\text{M}$  for BtPNP and  $K_M = 40$   $\mu\text{M}$  for HsPNP, which are consistent with published values.<sup>2-4</sup>

**7-(pyrrolidin-2-yl)-3H-pyrrolo[3,2-d]pyrimidin-4(5H)-one (7).**

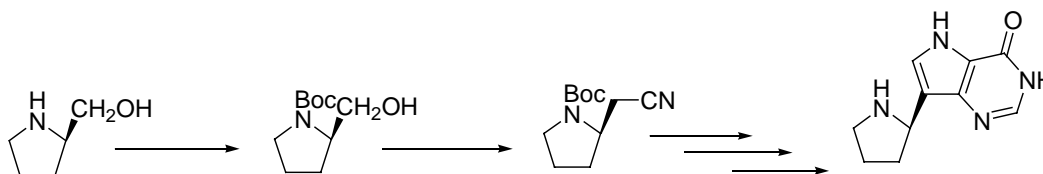

Di-*tert*-butyldicarbonate (2.8 g) was added to a solution of (*R*)-2-pyrrolidinemethanol (1.0 g) in dichloromethane (10 mL). After 1 h, the solution was concentrated and flash chromatography of the residue afforded the *N*-Boc derivative (2.0 g). A solution of this material in pyridine (20 mL) was treated with methanesulfonyl chloride (0.5 mL). After 1 h, chloroform was added and the solution was washed with water (x2), aq HCl, and aq NaHCO<sub>3</sub>. Rotary evaporation gave a syrup which was dissolved in DMSO (20 mL), potassium cyanide (3.2 g) was added and the mixture was heated at 80 °C for 3 h. Chloroform was added and the mixture was washed with water (x2), dried and concentrated to a syrup (1.35 g) of nitrile adduct. This material was converted to 7-(pyrrolidin-2-yl)-3H-pyrrolo[3,2-d]pyrimidin-4(5H)-one by the general method described previously.<sup>5</sup> <sup>1</sup>H NMR (D<sub>2</sub>O):  $\delta$  7.98 (1H, s), 7.62 (1H, s), 4.92 (1H, m), 3.44 (2H, m), 2.54-2.07 (4H, m); <sup>13</sup>C NMR (D<sub>2</sub>O):  $\delta$  155.5, 143.6, 142.9, 128.7, 118.3, 111.0, 55.1, 45.5, 29.9, 23.9. C<sub>10</sub>H<sub>13</sub>N<sub>4</sub>O: HRMS (MH<sup>+</sup>): calc.: 205.1089; found: 205.1089.

### 7-(Pyrrolidin-1-ylmethyl)-3H-pyrrolo[3,2-d]pyrimidin-4(5H)-one (**8**).

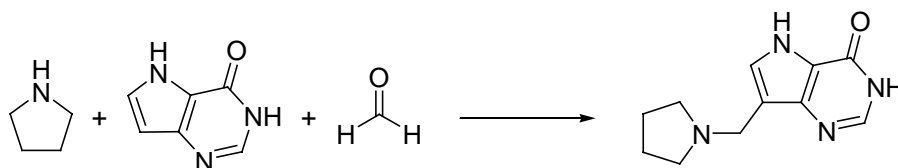

Deazahypoxanthine (3.00 g, 22.5 mmol)<sup>6</sup> was added portionwise to a solution of pyrrolidine (2.5 mL, 30.0 mmol) and formaldehyde (0.50 mL, 49 mmol) in water (10 mL) and heated at 95 °C for 16 h. The reaction was then cooled to room temp. and the resulting precipitate filtered and washed with acetone (25 mL) and diethyl ether (25 mL), recrystallised from 1% water in methanol to afford **8** (3.39 g, 69%) as a white solid. M.P. >300 °C. <sup>1</sup>H NMR of the HCl salt (D<sub>2</sub>O): δ 8.64 (s, 1H), 7.49 (s, 1H), 4.14 (s, 2H), 3.15 (m, 2H), 2.76 (m, 2H), 1.70 (m, 2H), 1.54 (m, 2H). <sup>13</sup>C NMR of the HCl salt (D<sub>2</sub>O): δ 152.2, 145.1, 133.1, 131.5, 118.3, 102.8, 53.6, 47.1, 22.7. C<sub>11</sub>H<sub>15</sub>N<sub>4</sub>: HRMS (MH<sup>+</sup>): calc.: 219.1246; found: 219.1240. Elemental analysis (C, H, N) was performed by Microana (Wilmington) calc.: C 60.53, H 6.47, N 25.67; found C 60.50, H 6.32, N 25.47.

### Determination of *K<sub>d</sub>* values for inhibitors of Table 1.

Inhibitor dissociation constants for the phosphorolysis of inosine were based on initial or equilibrium reaction rate measurements with varied inhibitor concentrations. The reactions were started by adding huPNP or *Bt*PNP to reaction mixtures containing 1 mM inosine in 50 mM KHPO<sub>4</sub>, with xanthine oxidase at 60 milliunits/ml. Hypoxanthine formed by phosphorolysis of inosine was oxidized to uric acid and monitored spectrophotometrically at 293 nm (extinction coefficient for uric acid  $\epsilon_{293} = 12.9 \text{ mM}^{-1} \text{ cm}^{-1}$

<sup>1</sup>). For compounds **1** and **2** the reactions were performed at 30 °C and pH 7.7, whereas for compounds **3** – **8** the reactions were performed at 25 °C and pH 7.4. Enzyme concentration was adjusted to give absorbance changes not exceeding 1.0 during the time required to characterize initial and final slow onset inhibition equilibria. The large excess of substrate and continuous product depletion provided extended initial rate conditions. In most cases the inhibitor concentration was >10-fold greater than the enzyme concentration as required for simple analysis of two-state slow onset tight binding inhibition. In the cases of the most tightly bound inhibitors it was not possible to maintain this condition and corrections were made to compensate for the concentration of bound inhibitor. The inhibition constant  $K_i$  describes the reversible equilibrium between enzyme and inhibitor for the initial inhibitor binding step.  $K_i$  was determined by fitting the initial rates at different inhibitor concentration to the equation for competitive inhibition:  $v_i = (k_{cat} \times S) / (K_m(1 + I/K_i) + S)$ , where  $v_i$  is initial reaction rate,  $k_{cat}$  is the catalytic turnover number,  $K_m$  is the Michaelis constant,  $K_i$  is the dissociation constant of enzyme-inhibitor complex ( $EI$ ),  $I$  is inhibitor concentration, and  $S$  is substrate concentration. The dissociation constant for the complex formed after slow onset equilibrium ( $K_i^*$ ) was determined by  $v = (k_{cat} \times S) / (K_m(1 + I/K_i^*) + S)$ , where  $v$  is the steady state reaction rate and the other variables are the same as above. The reported  $K_d$  values represent the final equilibrium dissociation constants for each enzyme-inhibitor combination.

**Figure 1**  $^1\text{H-NMR}$  of compound **7**.

Owner pct  
 Sample pct-523  
 Platform 355  
 Job No 35580200

RT-I-523

Current Data Parameters

NAME pct523  
 EXPNO 20  
 PROCNO 1

F2 - Acquisition Parameters

Date 20051213  
 Time 19 52  
 PPGPND 5 mm QNP 1H  
 PULPROG zgpg30  
 TO 32768  
 SOLVENT D2O  
 NS 64  
 DS 2  
 SFO1 6188.119 Hz  
 A0 2.6477044 sec  
 R6 406.4  
 D1 1.00000000 sec

===== CHANNEL f1 =====

MUFC1 1H  
 P1 11.50 usec  
 PL1 -3.00 dB  
 SFO1 300.138534 MHz

F2 - Processing parameters

SI 16384  
 SF 300.1300000 MHz  
 MDW EM  
 SSB 0  
 LB 0.30 Hz  
 GB 0  
 PC 4.00

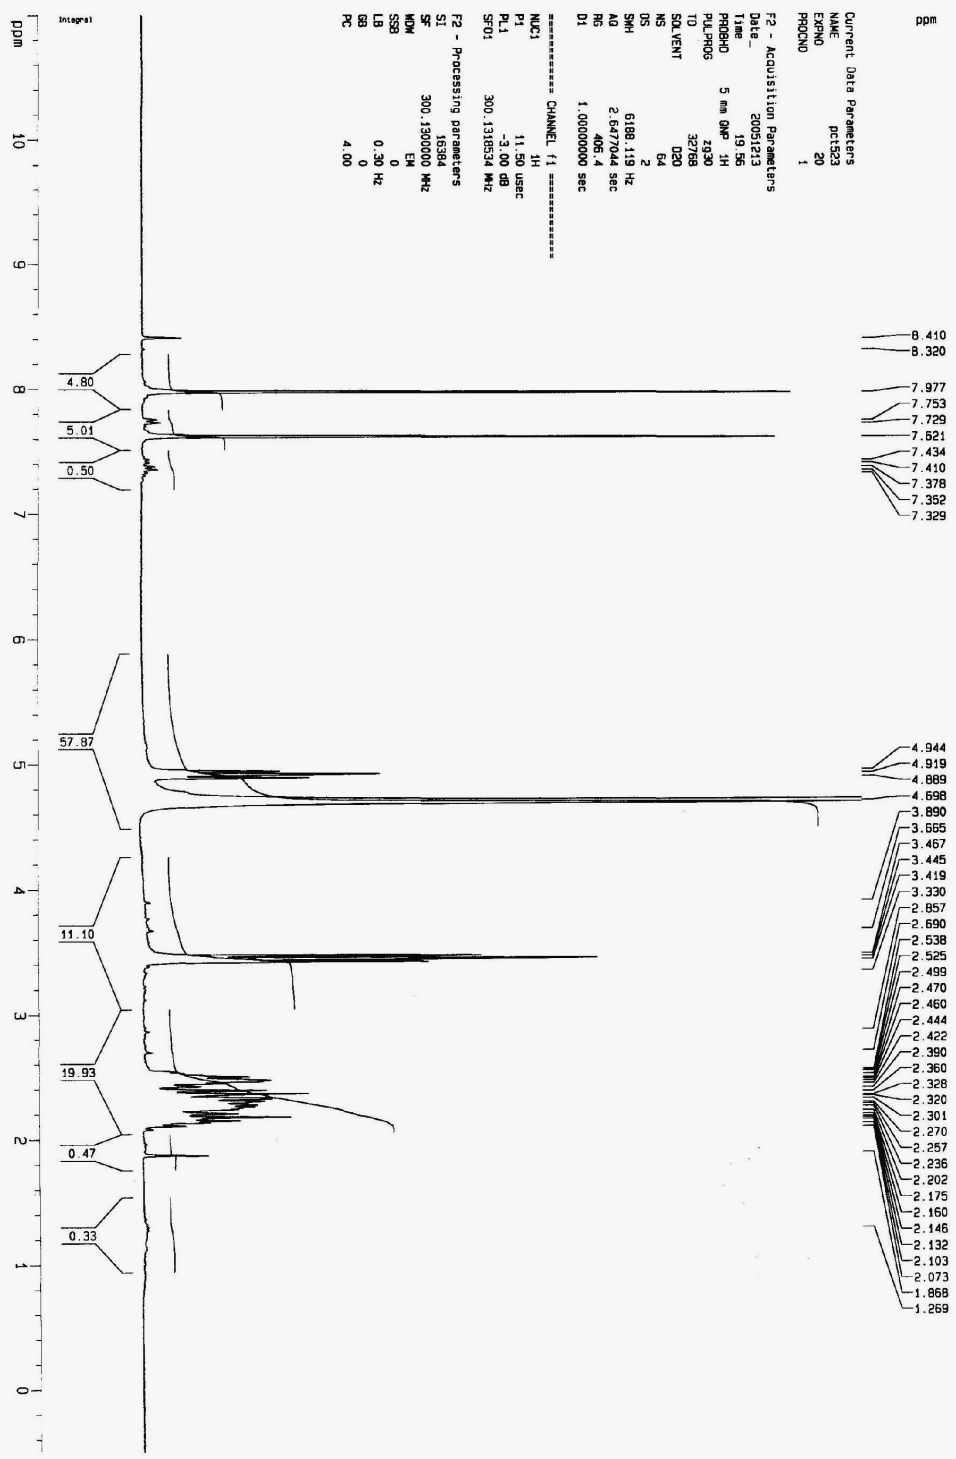

**Figure 2**  $^{13}\text{C}$ -NMR of compound **7**.

UWHR pct  
 Sample pct-523  
 Platform 355  
 Job No 35580200

Current Data Parameters  
 NAME pct523  
 EXPNO 22  
 PROCNO 1

F2 - Acquisition Parameters  
 Date\_ 20051213  
 Time 21:38  
 PROBR0 5 mm QNP 1H  
 PULPROG zgpg30  
 TO 32768  
 SOLVENT D2O  
 NS 4899  
 DS 2  
 SWH 1893.365 Hz  
 AQ 0.8651252 sec  
 RG 16364  
 DI 0.5000000 sec  
 D11 0.0300000 sec  
 D12 0.0002000 sec

\*\*\*\*\* CHANNEL f1 \*\*\*\*\*  
 NU1 13C  
 P1 9.00 usec  
 PL1 -2.00 dB  
 SF01 75.4730431 MHz

\*\*\*\*\* CHANNEL f2 \*\*\*\*\*  
 CPDPRG2 waltz16  
 NU2 1H  
 PCPD2 80.00 usec  
 PL2 0.00 dB  
 PL13 13.00 dB  
 PL15 21.00 dB  
 SF02 300.1312003 MHz

F2 - Processing parameters  
 SI 16384  
 SF 75.4677150 MHz  
 NDM EN  
 SSB 0  
 LB 5.00 Hz  
 GB 0  
 PC 1.40

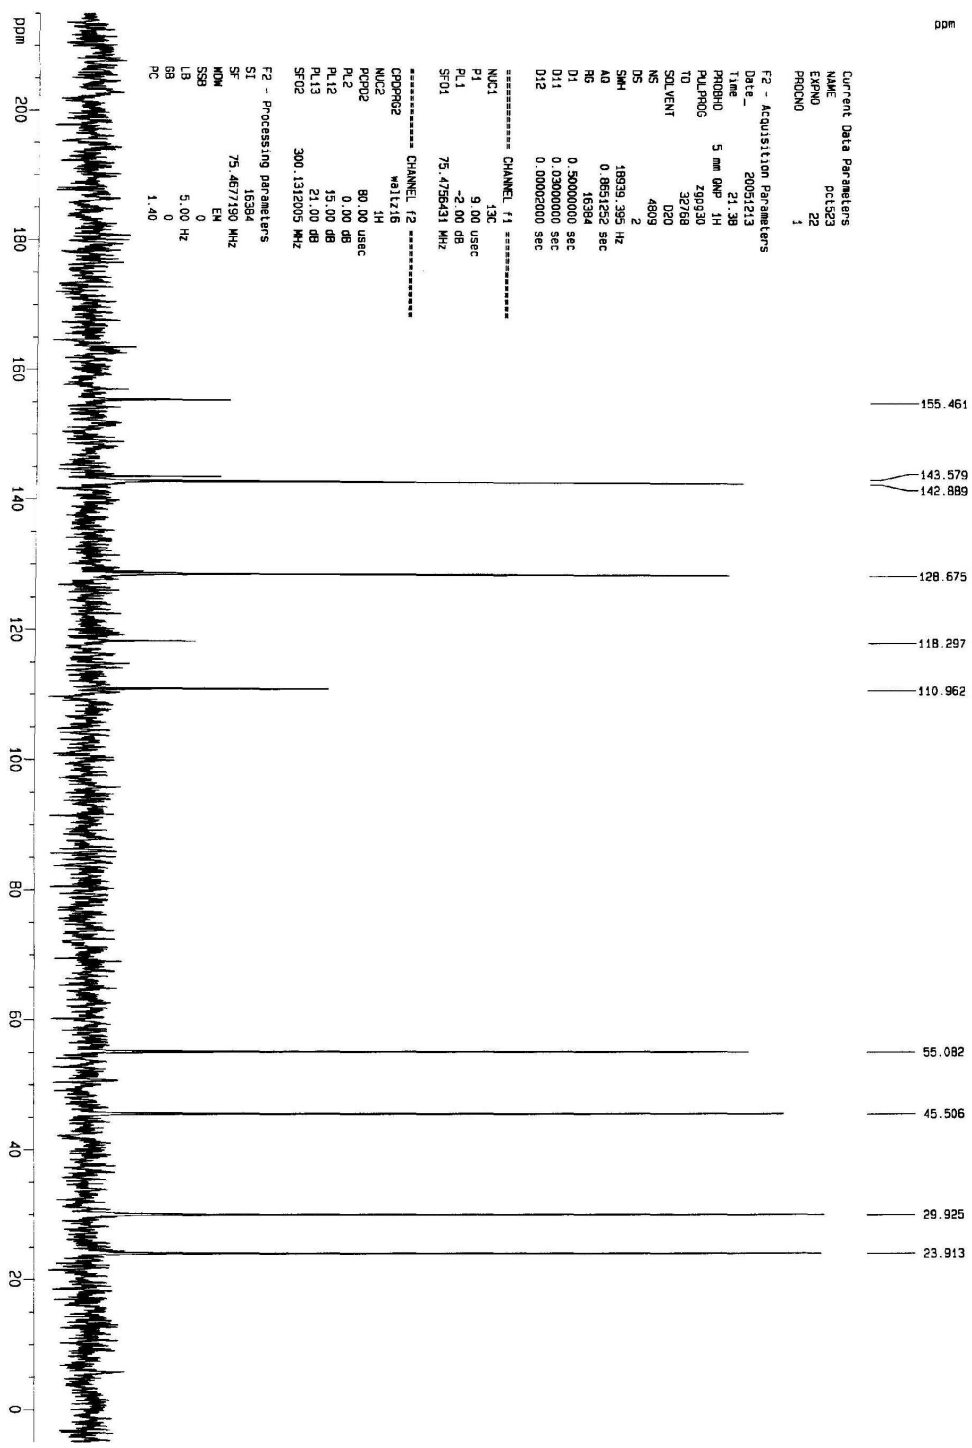



## References

1. Extinction coefficients were determined using the Protparam tool ([www.expasy.org/tools/protparam/html](http://www.expasy.org/tools/protparam/html)).
2. Miles, R. W.; Tyler, P.C.; Furneaux, R. H.; Bagdassarian, C. K.; Schramm, V. L. *Biochemistry*, **1998**, *37*, 8615-8621;
3. Lewandowicz, A., and Schramm, V. L. *Biochemistry*, **2004**, *43*, 1458-1468.
4. Erion, M. D.; Takabayashi, K.; Smith, H. B.; Kessi, J.; Wagner, S.; Honger, S.; Shames, S. L.; Ealick, S. E. *Biochemistry*, **1997**, *36*, 11725-11734.
5. Evans, G.B.; Furneaux, R.H.; Gainsford, G.J.; Schramm, V.L.; Tyler, P.C. *Tetrahedron* **2000**, *56*, 3053-3062.
6. Evans, G.B.; Furneaux, R.H.; Lewandowicz, A., and Schramm, V. L.; Tyler, P.C. *J. Med. Chem.*, **2003**, *46*, 5271-5276.
